# Supplementary material for: Synthesis, structure, and interconversion of chiral rhenium oxygen- and sulfur-bound sulfoxide complexes of formula [(η5-C5H5)Re(NO)(PPh3)(OS(Me)R)]+ X−; diastereoselective oxidations of coordinated methyl alkyl sulfides †
Source: Royal Society of Chemistry journal article supplement (doi:10.1039/b009533h), 2001-01-01
Supplement: b009533h.doc [file b009533h.doc]

**SUPPLEMENTARY MATERIAL FOR**

**Synthesis, Structure, and Interconversion of Chiral Rhenium Oxygen- and Sulfur-Bound Sulfoxide Complexes of the Formula [(5-C5H5)Re(NO)(PPh3)(OS(Me)R)]**+ **X**-**; Diastereoselective Oxidations of Coordinated Methyl Alkyl Sulfides**

**Michael Otto,a Brian J. Boone,b Atta M. Arif,b and J. A. Gladysza***

*a*Institut für Organische Chemie, Universität Erlangen-Nürnberg, Henkestrasse 42, 91054 Erlangen, Germany

*b*Department of Chemistry, University of Utah, Salt Lake City, Utah 84112, USA

**Supplementary Discussion**

Since oxidations of both Schenk's ruthenium carbonyl and our rhenium nitrosyl systems are plagued by side-reactions, the relative diastereoselectivities become less meaningful. However, for the one ligand common to both studies, methyl *i*-propyl sulfoxide, our diastereomer ratios are some­what higher (**3c**+ X-, 88-89:12-11 vs **6c**+ PF6-, 64:36). Schenk also independently prepared **6c**+ PF6- from the ruthenium chloride complex (5-C5H5)Ru(CO)(PPh3)(Cl) and methyl *i*-propyl sulfoxide. A 86:14 diastereomer ratio was obtained, higher than our range for **3c**+ X- in Table 1 (57-47:43-53). The reaction conditions (methanol, NH4+ PF6-, 60 °C) did not lend themselves to the detection of a kinetic oxygen-bound isomer. Since only racemic ruthenium carbonyl complexes were employed, no configurational assignments were attempted.

**Supplementary Experimental Data**

**General Methods.** All reactions were carried out under dry N2 atmospheres. IR spectra were recorded on a Mattson Polaris (FT) spectrometer. Most NMR spectra were recorded on Varian spectrometers as outlined in Table 1. Microanalyses were performed by Atlantic Microlab. Melting points were determined in capillaries sealed under inert atmospheres. Solvents were purified as fol­lows: CH2Cl2, distilled from CaH2; THF, ether, hexane, distilled from Na/O=CPh2; toluene, distill­ed from Na; C6H5Cl, distilled from P2O5; acetone, CHCl3 (EM Science), CDCl3, DMSO-*d*6 (Cam­bridge Isotope Laboratories), used as received; CD2Cl2, vacuum transferred from CaH2. Sulfides S(Me)R, DMSO (Aldrich or Pfaltz & Bauer), and P(*p*-tol)3 (Strem) were used as received.

**[(5-C5H5)Re(NO)(PPh3)(O=S(Me)Et)]+ BF4- (2b+ BF4-)**. Complex **8** (0.429 g, 0.767 mmol), C6H5Cl (3 mL), HBF4•OEt2 (0.100 mL, 0.780 mmol), and O=S(Me)Et (0.123 g, 1.14 mmol) were combined in a procedure analogous to that given for **2a**+ BF4-. A similar workup gave an orange powder that was a 91:9 **2b**+/**3b**+ BF4- mixture (0.309 g, 0.427 mmol, 56%).44 Character­ization data are in the text.

**[(5-C5H5)Re(NO)(PPh3)(O=S(Me)*i*-Pr)]+ BF4- (2c+ BF4-)**. Complex **8** (0.511 g, 0.915 mmol), C6H5Cl (8 mL), HBF4•OEt2 (0.120 mL, 0.936 mmol), and O=S(Me)*i*-Pr (0.134 g, 1.259 mmol) were combined in a procedure analogous to that given for **2a**+ BF4-. A similar workup gave an orange powder that was a 85:15 **2c**+/**3c**+ BF4- mixture (0.572 g, 0.777 mmol, 85%).44 Character­ization data are in the text.

**[(5-C5H5)Re(NO)(PPh3)(O=S(Me)*t*-Bu)]+ BF4- (2d+ BF4-)**. Complex **8** (0.519 g, 0.928 mmol), C6H5Cl (8 mL), HBF4•OEt2 (0.120 mL, 0.936 mmol), and O=S(Me)*t*-Bu (0.142 g, 0.936 mmol) were combined in a procedure analogous to that given for **2a**+ BF4-. A similar workup gave an orange powder that was a 99:1 **2d**+/**3d**+ BF4- mixture (0.656 g, 0.873 mmol, 94%).44 Character­ization data are in the text.

**[(5-C5H5)Re(NO)(PPh3)(O=S(Me)*i*-Pr)]+ TfO- (2c+ TfO-)**. Additional NMR data (CD2­Cl2, *RS*,*SR*/*RR*,*SS*):44,46 1H ( 7.68-7.21 (m, 15H of 3 C6H5), 5.45/5.48 (d, *J*=0.5/0.5 Hz, C5H5), 3.05/3.04 (h, *J*=7.0/6.9 Hz, SCH), 2.47/2.45 (s, SCH3), 1.03/1.01 (d, *J*=7.0/7.0 Hz, CHC*H*3), 0.87/0.82 (d, *J*=7.1/7.0 Hz, CHC'*H*3); 31P{1H} (ppm) 18.9/18.2 (s).

**[(5-C5H5)Re(NO)(PPh3)(O=S(Me)*t*-Bu)]+ TfO- (2d+ TfO-)**. Additional NMR data (CD2­Cl2, *RS*,*SR*/*RR*,*SS*):44,46 1H () 7.60-7.45 (m, 9H of 3 C6H5), 7.37-7.27 (m, 6H of 3 C6H5), 5.43/5.48 (s, C5H5), 2.46/2.43 (s, SCH3), 1.07/1.11 (s, CCH3); 13C{1H} (ppm) PPh at 133.4/- (d, *J*=11.0/- Hz, *o*), 131.6/- (d, *J*=55.1/- Hz, *i*), 131.3/- (d, *J*=2.0/- Hz, *p*), 129.0/- (d, *J*=10.8/- Hz, *m*), 120.5 (q, *J*CF=320.9 Hz, CF3), 91.71/91.68 (s, C5H5), 58.3/56.4 (s, *C*CH3), 27.1/28.4 (s, SCH3), 21.8/22.0 (s, C*C*H3); 31P{1H} (ppm) 19.3/18.8 (s).

**[(5-C5H5)Re(NO)(PPh3)(S(=O)(Me)*i*-Pr)]+ BF4- (3c+ BF4-)**. Complex **8** (0.355 g, 0.635 mmol), C6H5Cl (3 mL), HBF4•OEt2 (0.0820 mL, 0.640 mmol), and O=S(Me)*i*-Pr (0.102 g, 0.966 mmol) were combined in a procedure analogous to that given for **3b**+ BF4-. A similar workup gave **3c**+ BF4- as a yellow powder (0.449 g, 0.610 mmol, 96%). Characterization data are in the text.

**[(5-C5H5)Re(NO)(PPh3)(S(=O)(Me)*t*-Bu)]+ BF4- (3d+ BF4-)**.Complex **8** (0.488 g, 0.874 mmol), C6H5Cl (3 mL), HBF4•OEt2 (0.120 mL, 0.936 mmol), and O=S(Me)*t*-Bu (0.112 g, 0.933 mmol) were combined in a procedure analogous to that given for **3b**+ BF4-. After 28 h, a similar workup gave **3d**+ BF4- as a yellow powder (0.128 g, 0.171 mmol, 20%). Characterization data are in the text.

**[(5-C5H5)Re(NO)(PPh3)(S(=O)(Me)Et)]+ TfO- (3b+ TfO-)**. Additional NMR data (CD2­Cl2, *SR*,*RS*/*SS*,*RR*):44,46 1H () 7.65-7.38 (m, 15H of 3 C6H5), 5.70/5.68 (s, C5H5), 3.59 (m, SC*H*H'), 3.47/3.31 (dq, *J*=7.3/7.2 Hz, SCH*H*'), 3.22/3.10 (s, SCH3), 1.23/1.19 (t, *J*=7.3/7.2 Hz, CH2C*H*3); 13C{1H} (ppm) PPh at 133.9/134.0 (d, *J*=10.9/11.0 Hz, *o*), 132.8/132.9 (d, *J*=57.7/57.7 Hz, *i*), 132.0/132.1 (d, *J*=2.7/2.5 Hz, *p*), 129.47/129.51 (d, *J*=11.2/11.2 Hz, *m*), 121.3 (q, *J*CF=320.9 Hz, CF3), 94.2/94.4 (s, C5H5), 61.2/61.7 (s, SCH2), 50.2/47.2 (s, SCH3), 6.92/6.93 (s, CH2*C*H3); 31P{1H} (ppm) 9.2/9.4 (s).

**[(5-C5H5)Re(NO)(PPh3)(S(=O)(Me)*i*-Pr)]+ TfO- (3c+ TfO-)**. Additional NMR data (CD2Cl2, *SR*,*RS*/*SS*, *RR*):44,46 1H () 7.62-7.38 (m, 15H of 3 C6H5), 5.64/5.70 (s, C5H5), 3.65/3.53 (h, *J*=7.0/6.7 Hz, SCH), 2.30/3.02 (s, SCH3), -/1.37 (d, *J*=-/6.7 Hz, CHC*H*3), 1.31/1.34 (d, *J*=7.2/6.9 Hz, CH­C*H*3); 13C{1H} (ppm) PPh at 134.2/133.8 (d, *J*=11.3/10.9 Hz, *o*), -/132.6 (d, *J*=-/57.9 Hz, *i*), 132.4/132.0 (d, *J*=2.3/2.4 Hz, *p*), 129.7/129.4 (d, *J*=11.3/11.2 Hz, *m*), 95.0/94.1 (s, C5H5), 68.6/67.2 (s, SCH), -/47.1 (s, SCH3), 17.5/16.9 (s, CH*C*H3), 14.1/15.9 (s, CH*C*'H3); 31P{1H} (ppm) 7.7/9.9 (s).

**[(5-C5H5)Re(NO)(PPh3)(S(Me)Et)]+ BF4- (5b+ BF4-)**. Additional NMR data:46 1H (, CDCl3) 7.56-7.50 (m, 9H of 3 C6H5), 7.32-7.70 (m, 6H of 3 C6H5), 5.61 (s, C5H5), 2.82 (q, *J*=7.5 Hz, SCH2), 2.37 (s, SCH3), 1.15 (t, *J*=7.3 Hz, CH2C*H*3).

**[(5-C5H5)Re(NO)(PPh3)(S(Me)*i*-Pr)]+ BF4- (5c+ BF4-)**. Complex **8** (0.316 g, 0.565 mmol), C6H5Cl (3 mL), HBF4•OEt2 (0.0750 mL, 0.585 mmol), and S(Me)*i*-Pr (0.169 g, 1.87 mmol) were combined in a procedure analogous to that given for **5b**+ BF4-. A similar workup gave **5c**+ BF4- as a yellow powder (0.313 g, 0.435 mmol, 77%), mp 138-139 °C dec. Anal. Calcd for C27H30BF4NOPReS: C, 45.00; H, 4.20. Found: C, 45.27; H, 4.34. IR: NO 1700 vs.45 1H NMR (, CDCl3)46 7.56-7.49 (m, 9H of 3 C6H5), 7.28-7.22 (m, 6H of 3 C6H5), 5.62 (s, C5H5), 3.06 (h, *J*=6.6 Hz, SCH), 2.19 (s, SCH3), 1.39 (d, *J*=6.6 Hz, CHC*H*3), 1.29 (d, *J*=6.8 Hz, CHC'*H*3).

**[(5-C5H5)Re(NO)(PPh3)(S(Me)*t*-Bu)]+ BF4- (5d+ BF4-)**. Complex **8** (0.326 g, 0.584 mmol), C6H5Cl (3 mL), HBF4•OEt2 (0.0770 mL, 0.601 mmol), and S(Me)*t*-Bu (0.148 g, 1.42 mmol) were combined in a procedure analogous to that given for **5b**+ BF4-. A similar workup gave **5d**+ BF4- as an orange powder (0.401 g, 0.546 mmol, 94%), mp 184-185 °C dec. Anal. Calcd for C28H32BF4NOPReS: C, 45.78; H, 4.39. Found: C, 45.65; H, 4.35. IR: NO 1700 vs.45 1H NMR (, CDCl3)46 7.56-7.49 (m, 9H of 3 C6H5), 7.36-7.24 (m, 6H of 3 C6H5), 5.62 (s, C5H5), 2.09 (s, SCH3), 1.38 (s, CCH3).

**Table 2 (Full Version). Summary of Crystallographic Data for Methyl *t*-Butyl Sulfoxide Complex (*R*Re*S*S,*S*Re*R*S*)*-[(5-C5H5)Re(NO)(PPh3)(O=S(Me)*t-*Bu)]+ TfO-•0.5CH2Cl2 ((*R*Re*S*S,*S*Re*R*S)-2d+ TfO-•0.5CH2Cl2)**

| chemical formula | C29.5H33ClF3NO5PReS2 |
| --- | --- |
| formula weight | 855.343 |
| crystal system | triclinic |
| space group | (No. 2) |
| cell dimensions |  |
| *a*, Å | 10.758(2) |
| *b*, Å | 11.121(2) |
| *c*, Å | 14.558(3) |
| , deg | 102.47(2) |
| **, deg | 102.42(2) |
|  deg | 77.26(2) |
| *V*, Å3 | 1632.79 |
| *Z* | 2 |
| temp, °C | -125 |
| dcalc, g/cm3 | 1.74 (-125 °C) |
| dobs, g/cm3 (CCl4/CH2I2) | 1.67 (25 °C) |
| crystal dimensions, mm | 0.27 x 0.25 x 0.07 |
| diffractometer | Enraf-Nonius CAD-4 |
| radiation () | Mo K(0.70930) |
| data collection method | - 2 |
| scan speed, deg/min | 2.0 |
| reflections measured | 5429 |
| range/indices (*hkl*) | 0,12; -12,12; -16,16 |
| scan range | 0.80 + 0.33(tan) |
| 2 limit, deg | 2.0-48.0 |
| Std. reflection check | 1 X-ray hour |
| total no. of unique data | 5118 |
| no. of observed data, I > 3(I) | 4506 |
| abs coefficient, cm-1 | 40.80 |
| min transmission, % | 53.36 |
| max transmission, % | 99.93 |
| no. of variables | 389 |
| goodness of fit | 0.93 |
| R = ||Fo| - |Fc||/|Fo| | 0.043 |
| Rw = ||Fo| - |Fc||*w*1/2/|Fo|*w*1/2 | 0.053 |
| / (max) | 0.016 |
|  (max), e/Å3 | 1.469 (1.258 Å from Re) |
